# Supplementary material for: Synthesis, structural characterization and computational study of a novel amino chalcone: a potential nonlinear optical material
Source: Royal Society of Chemistry journal article supplement (doi:10.1039/c5nj03214h), 2016-12-17
Supplement: c5nj03214h1.pdf [file c5nj03214h1.pdf]

## Synthesis, Structural Characterization and Computational Study of a Novel Amino Chalcone: a Potential Nonlinear Optical Material

Leonardo R. Almeida<sup>†</sup>, Murilo M. Anjos<sup>‡</sup>, Gabriela C. Ribeiro<sup>†</sup>, Clodoaldo Valverde<sup>†,§</sup>, Daniel F. S. Machado<sup>¶</sup>, Guilherme R. Oliveira<sup>\*,‡</sup>, Hamilton B. Napolitano<sup>\*,†</sup> and Heibbe C. B. Oliveira<sup>\*,¶</sup>

<sup>†</sup> Campus de Ciências Exatas e Tecnológicas, Universidade Estadual de Goiás, Caixa Postal 459, 75001-970, Anápolis, GO, Brazil.

<sup>‡</sup> Instituto de Química, Universidade Federal de Goiás, Caixa Postal 131, Campus Samambaia, 74001-970, Goiânia, GO, Brazil.

<sup>§</sup> Universidade Paulista, 74845-090 and Escola Superior Associada de Goiânia, 74840-090, Goiânia, GO, Brazil.

<sup>¶</sup> Laboratório de Estrutura Eletrônica e Dinâmica Molecular (LEEDMOL), Instituto de Química, Universidade de Brasília, Caixa Postal 4478, 70904-970, Brasília, DF, Brazil.

E-mail: [heibbe@unb.br](mailto:heibbe@unb.br), [groberto@ufg.br](mailto:groberto@ufg.br), [hamilton@ueg.br](mailto:hamilton@ueg.br)

New Journal of Chemistry

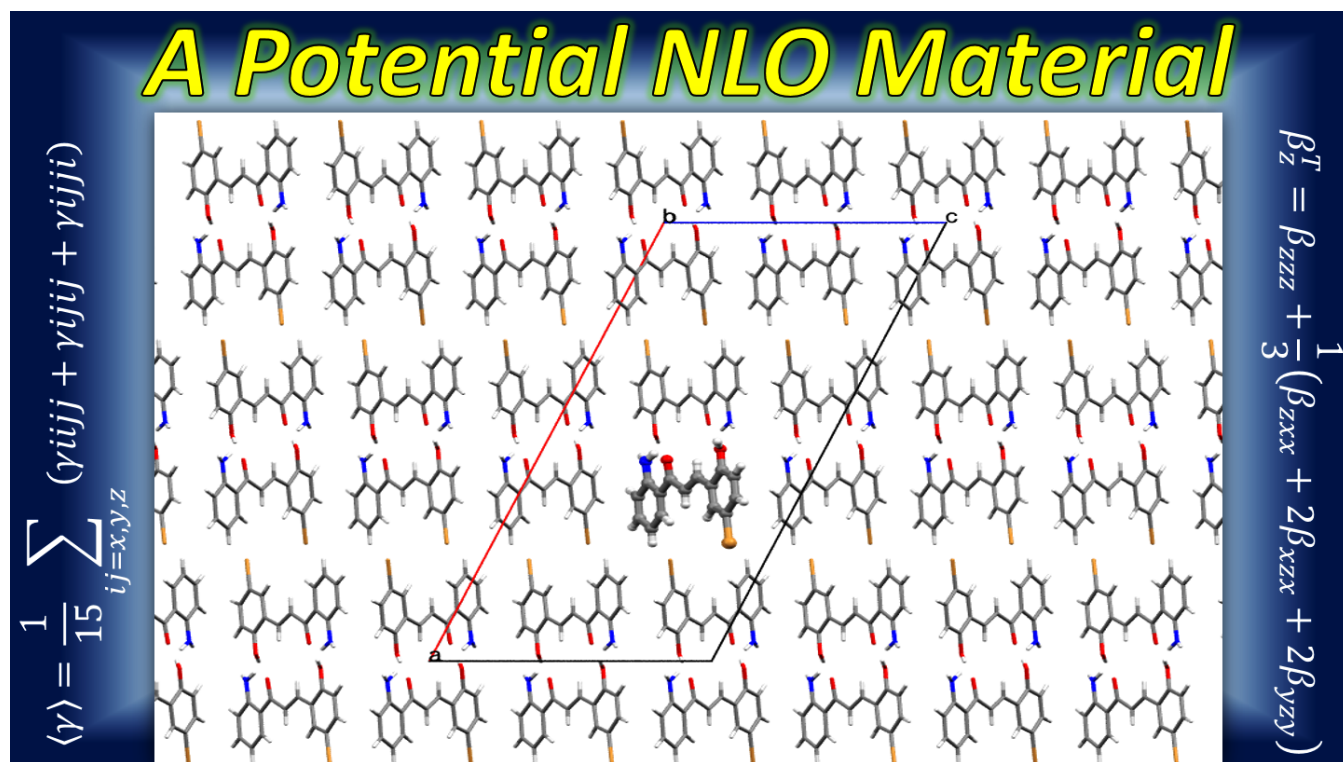

## Summary

Table S1 \_\_\_\_\_ Page S3

Table S2 \_\_\_\_\_ Page S3

Table S3 \_\_\_\_\_ Page S4

Table S4 \_\_\_\_\_ Page S5

Figure S1 \_\_\_\_\_ Page S6

Cartesian coordinates for all the calculated structures \_\_\_\_\_ Pages S7-S12

**FIGURE S1:****TABLE S1:** CAM-B3LYP/6-311+G(d) results for the components of the dipole moment (D), static linear polarizability (in  $10^{-24}$  esu) and second hyperpolarizability (in  $10^{-36}$  esu) as a function of the iterative process.

| <b>0</b> | <b>1</b> | <b>2</b> | <b>3</b> | <b>4</b> | <b>5</b> |
|----------|----------|----------|----------|----------|----------|
| 1.39     | 1.80     | 1.98     | 2.01     | 2.03     | 2.03     |
| 32.42    | 32.71    | 32.82    | 32.85    | 32.86    | 32.86    |
| 64.05    | 67.71    | 68.81    | 69.14    | 69.29    | 69.29    |

**TABLE S2:** PCM-CAM-B3LYP/6-311+G(d) results for the components of the dipole moment (D), static linear polarizability (in  $10^{-24}$  esu), first hyperpolarizability (in  $10^{-30}$  esu) and second hyperpolarizability (in  $10^{-36}$  esu) calculated in gas-phase and in different solvents.

| <b>Gas</b> | <b>Chloroform</b> | <b>THF</b> | <b>Acetone</b> | <b>Ethanol</b> | <b>Methanol</b> | <b>DMSO</b> |
|------------|-------------------|------------|----------------|----------------|-----------------|-------------|
| 1.58       | 2.07              | 2.12       | 2.19           | 2.20           | 2.21            | 2.22        |
| 33.93      | 42.14             | 43.58      | 45.48          | 45.69          | 45.93           | 46.17       |
| 0.71       | 2.24              | 2.83       | 3.70           | 3.78           | 3.84            | 4.01        |
| 66.32      | 136.13            | 151.14     | 172.08         | 174.48         | 177.23          | 180.00      |

**TABLE S3:** PCM-CAM-B3LYP 6-311+G(d) results for the CHELPG atomic charges of 2-amino-chalcone calculated in gas-phase and in different solvents.

| Atomic Charge | Gas       | Chloroform | THF       | Acetone   | Ethanol   | Methanol  | DMSO      |
|---------------|-----------|------------|-----------|-----------|-----------|-----------|-----------|
| Br1           | -0.109761 | -0.122586  | -0.123493 | -0.124040 | -0.124300 | -0.124587 | -0.125212 |
| C2            | 0.390260  | 0.394905   | 0.396404  | 0.393580  | 0.391981  | 0.393726  | 0.392265  |
| C3            | -0.367544 | -0.361367  | -0.358387 | -0.359732 | -0.360074 | -0.354066 | -0.353416 |
| C4            | 0.670209  | 0.647785   | 0.646229  | 0.642585  | 0.642775  | 0.639115  | 0.637859  |
| C5            | 0.733478  | 0.738332   | 0.739081  | 0.742220  | 0.742482  | 0.734164  | 0.733935  |
| C6            | 0.093904  | 0.104471   | 0.105006  | 0.109764  | 0.109275  | 0.111754  | 0.112139  |
| H7            | 0.127524  | 0.116764   | 0.114996  | 0.112110  | 0.111934  | 0.109194  | 0.108692  |
| C8            | -0.052573 | -0.071166  | -0.073534 | -0.080046 | -0.078868 | -0.080108 | -0.079149 |
| C9            | 0.035356  | 0.027164   | 0.024380  | 0.018613  | 0.019443  | 0.019432  | 0.021618  |
| C10           | -0.033769 | -0.038404  | -0.034283 | -0.037236 | -0.038244 | -0.035308 | -0.034834 |
| H11           | 0.097798  | 0.107322   | 0.107158  | 0.110062  | 0.110278  | 0.109758  | 0.109079  |
| C12           | -0.326421 | -0.310326  | -0.313119 | -0.305710 | -0.303823 | -0.308452 | -0.307516 |
| H13           | 0.155797  | 0.169354   | 0.173555  | 0.175862  | 0.176006  | 0.177775  | 0.178143  |
| C14           | -0.353086 | -0.351823  | -0.351709 | -0.353444 | -0.354006 | -0.350274 | -0.349842 |
| H15           | 0.137315  | 0.150403   | 0.153483  | 0.157179  | 0.157541  | 0.157283  | 0.157693  |
| C16           | -0.459362 | -0.472532  | -0.476986 | -0.483538 | -0.483464 | -0.479448 | -0.480036 |
| H17           | 0.197968  | 0.212535   | 0.217018  | 0.221783  | 0.221750  | 0.222892  | 0.223954  |
| C18           | -0.078551 | -0.077081  | -0.076171 | -0.070811 | -0.072350 | -0.072501 | -0.075435 |
| H19           | 0.087212  | 0.095477   | 0.096160  | 0.096951  | 0.097539  | 0.096510  | 0.097104  |
| C20           | 0.013842  | 0.000920   | -0.006632 | -0.007025 | -0.006554 | -0.010574 | -0.011535 |
| H21           | 0.090070  | 0.101330   | 0.104523  | 0.105996  | 0.106205  | 0.107142  | 0.107537  |
| C22           | 0.002113  | -0.013800  | -0.023508 | -0.026778 | -0.026625 | -0.030572 | -0.031920 |
| H23           | 0.063215  | 0.074890   | 0.078679  | 0.081290  | 0.081772  | 0.081951  | 0.082483  |
| C24           | -0.233120 | -0.232717  | -0.222783 | -0.217669 | -0.218568 | -0.215755 | -0.214495 |
| H25           | 0.114498  | 0.121899   | 0.120403  | 0.119398  | 0.119864  | 0.119996  | 0.119869  |
| O26           | -0.621654 | -0.653942  | -0.658877 | -0.666990 | -0.667851 | -0.665734 | -0.666722 |
| O27           | -0.647171 | -0.670157  | -0.673407 | -0.676161 | -0.676183 | -0.676397 | -0.676400 |
| H28           | 0.450801  | 0.476909   | 0.480667  | 0.485101  | 0.485426  | 0.486050  | 0.486447  |
| N29           | -1.094810 | -1.081130  | -1.083534 | -1.083556 | -1.084128 | -1.083106 | -1.082349 |
| H30           | 0.427728  | 0.437795   | 0.440253  | 0.441902  | 0.442378  | 0.442372  | 0.442179  |
| H31           | 0.488733  | 0.478774   | 0.478428  | 0.478334  | 0.478390  | 0.477768  | 0.477866  |

**TABLE S4:** CAM-B3LYP 6-311+G(d) results for the CHELPG atomic charges of 2-amino-chalcone as function of the iterative process.

| Atomic Charge | 0        | 1        | 2        | 3        | 4        | 5        |
|---------------|----------|----------|----------|----------|----------|----------|
| Br1           | -0.11112 | -0.14924 | -0.15072 | -0.15521 | -0.1525  | -0.15524 |
| C2            | 0.36169  | 0.3997   | 0.40981  | 0.41168  | 0.41226  | 0.41263  |
| C3            | -0.25155 | -0.28168 | -0.29548 | -0.29691 | -0.29959 | -0.29827 |
| C4            | 0.44018  | 0.46724  | 0.48379  | 0.48663  | 0.48849  | 0.48818  |
| C5            | 0.65293  | 0.7347   | 0.75145  | 0.75389  | 0.75641  | 0.75511  |
| C6            | 0.11457  | 0.15307  | 0.15574  | 0.15729  | 0.15773  | 0.15763  |
| H7            | 0.09114  | 0.08408  | 0.08204  | 0.08263  | 0.08167  | 0.08262  |
| C8            | -0.04405 | -0.08334 | -0.09522 | -0.09564 | -0.09813 | -0.0969  |
| C9            | 0.03099  | 0.06062  | 0.06274  | 0.06466  | 0.06324  | 0.06456  |
| C10           | -0.00453 | -0.04345 | -0.04652 | -0.04891 | -0.04644 | -0.04838 |
| H11           | 0.09073  | 0.11406  | 0.11596  | 0.11659  | 0.11647  | 0.11663  |
| C12           | -0.34569 | -0.3469  | -0.34101 | -0.33592 | -0.33779 | -0.33515 |
| H13           | 0.19034  | 0.22446  | 0.22824  | 0.22993  | 0.22976  | 0.23027  |
| C14           | -0.32886 | -0.3392  | -0.34694 | -0.34504 | -0.34672 | -0.34515 |
| H15           | 0.16799  | 0.18212  | 0.18563  | 0.18616  | 0.18626  | 0.18638  |
| C16           | -0.49164 | -0.51686 | -0.52305 | -0.52436 | -0.52596 | -0.52525 |
| H17           | 0.21736  | 0.22196  | 0.22532  | 0.2241   | 0.2257   | 0.22432  |
| C18           | -0.12341 | -0.1291  | -0.12989 | -0.1346  | -0.13184 | -0.13494 |
| H19           | 0.12584  | 0.13954  | 0.14234  | 0.14322  | 0.14293  | 0.14332  |
| C20           | 0.00548  | -0.0101  | -0.00752 | -0.00917 | -0.00688 | -0.00866 |
| H21           | 0.09216  | 0.09874  | 0.10126  | 0.10069  | 0.10148  | 0.10086  |
| C22           | -0.06211 | -0.06528 | -0.06497 | -0.06615 | -0.06514 | -0.06627 |
| H23           | 0.09272  | 0.1005   | 0.10374  | 0.10366  | 0.10416  | 0.10385  |
| C24           | -0.19287 | -0.18349 | -0.17854 | -0.17921 | -0.1777  | -0.17876 |
| H25           | 0.11568  | 0.11519  | 0.11651  | 0.11566  | 0.11636  | 0.11569  |
| O26           | -0.55505 | -0.70731 | -0.74053 | -0.74759 | -0.75255 | -0.75084 |
| O27           | -0.61428 | -0.67727 | -0.70078 | -0.70335 | -0.70571 | -0.70538 |
| H28           | 0.43756  | 0.49268  | 0.51216  | 0.51626  | 0.51718  | 0.51801  |
| N29           | -0.77849 | -0.8568  | -0.89615 | -0.90116 | -0.90623 | -0.90486 |
| H30           | 0.33026  | 0.37445  | 0.38726  | 0.39101  | 0.39154  | 0.39226  |
| H31           | 0.34605  | 0.42691  | 0.45336  | 0.45917  | 0.46151  | 0.46175  |

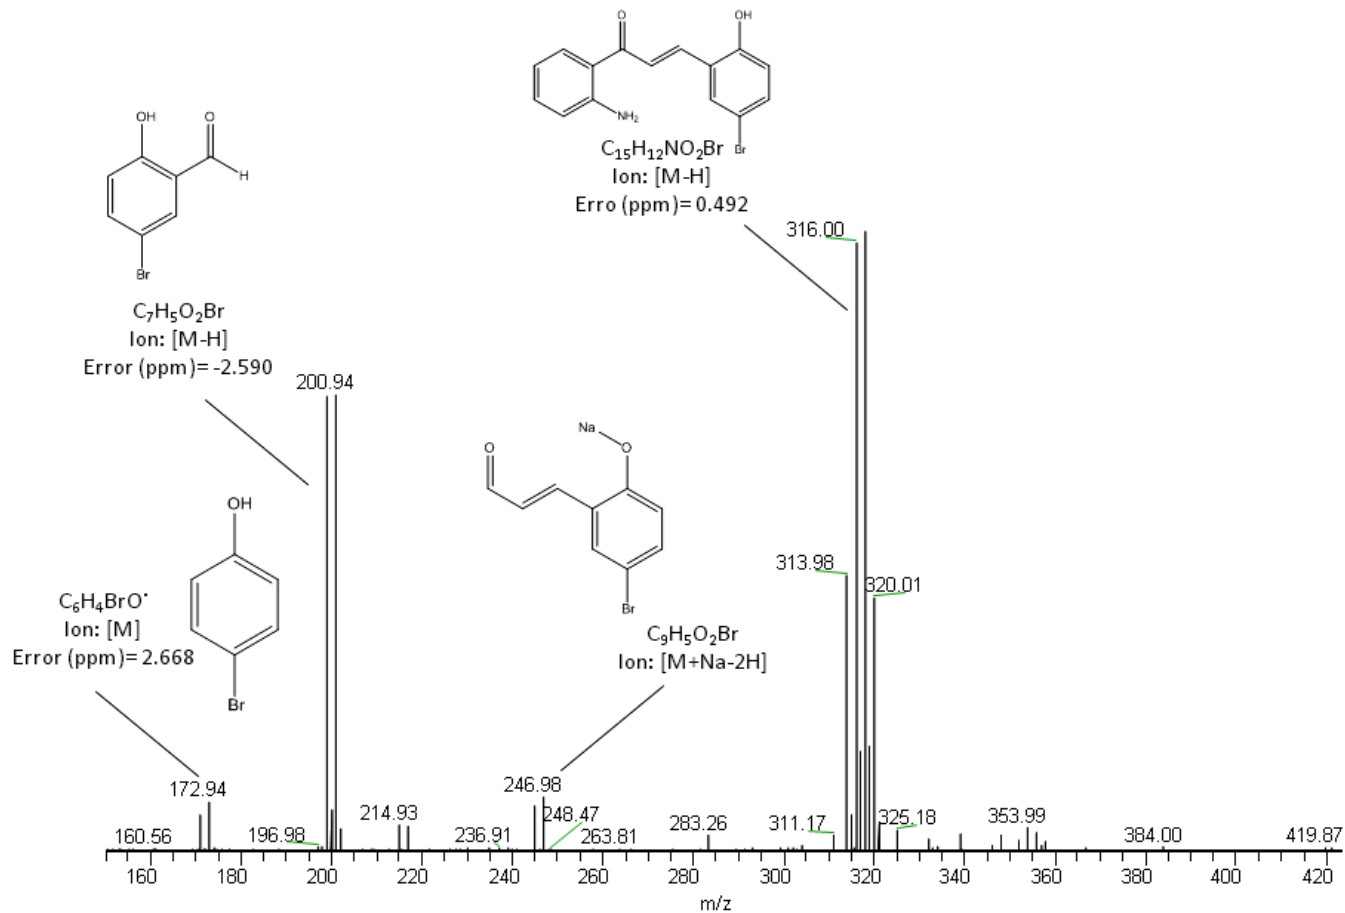

**Figure S1.** Mass Spectra of 2-amino-chalcone ( $C_{15}H_{12}BrNO_2$ ).

**Cartesian coordinates (Angstroms and Degrees), the calculated 2-amino-chalcone at CAM-B3LYP/6-311+G(d) level**

**1) Gas-Phase**

Standard orientation:

| Center Number | Atomic Number | Atomic Type | Coordinates (Angstroms) |           |           |
|---------------|---------------|-------------|-------------------------|-----------|-----------|
|               |               |             | X                       | Y         | Z         |
| 1             | 35            | 0           | -4.128883               | -1.925197 | 0.331812  |
| 2             | 6             | 0           | -2.216428               | 2.268712  | -0.406948 |
| 3             | 6             | 0           | 3.473040                | -0.176417 | -0.046300 |
| 4             | 6             | 0           | 4.817002                | 0.054357  | 0.355760  |
| 5             | 6             | 0           | 2.424361                | 0.824858  | 0.231017  |
| 6             | 6             | 0           | 0.053716                | 1.406869  | 0.072881  |
| 7             | 1             | 0           | 0.378238                | 2.432364  | 0.209707  |
| 8             | 6             | 0           | -1.387860               | 1.191461  | -0.063692 |
| 9             | 6             | 0           | -3.351362               | -0.216754 | 0.020059  |
| 10            | 6             | 0           | -4.162872               | 0.852105  | -0.327261 |
| 11            | 1             | 0           | -5.232613               | 0.721354  | -0.428176 |
| 12            | 6             | 0           | -3.588458               | 2.094402  | -0.538459 |
| 13            | 1             | 0           | -4.217324               | 2.936794  | -0.811290 |
| 14            | 6             | 0           | 5.780607                | -0.935525 | 0.078692  |
| 15            | 1             | 0           | 6.804024                | -0.766835 | 0.399207  |
| 16            | 6             | 0           | 0.996301                | 0.462453  | 0.030516  |
| 17            | 1             | 0           | 0.735505                | -0.573167 | -0.139974 |
| 18            | 6             | 0           | -1.986342               | -0.050946 | 0.154166  |
| 19            | 1             | 0           | -1.374351               | -0.891146 | 0.455431  |
| 20            | 6             | 0           | 5.449678                | -2.089008 | -0.590031 |
| 21            | 1             | 0           | 6.219715                | -2.825852 | -0.792635 |
| 22            | 6             | 0           | 3.180557                | -1.365930 | -0.735234 |
| 23            | 1             | 0           | 2.171467                | -1.541205 | -1.083350 |
| 24            | 6             | 0           | 4.138309                | -2.313958 | -1.014977 |
| 25            | 1             | 0           | 3.878655                | -3.215775 | -1.555561 |
| 26            | 8             | 0           | 2.701449                | 1.949782  | 0.639005  |
| 27            | 8             | 0           | -1.622576               | 3.473399  | -0.614267 |
| 28            | 1             | 0           | -2.278497               | 4.152383  | -0.801053 |
| 29            | 7             | 0           | 5.195109                | 1.178201  | 1.017885  |
| 30            | 1             | 0           | 6.169114                | 1.338863  | 1.203627  |
| 31            | 1             | 0           | 4.538713                | 1.941178  | 1.086408  |

**1) Chloroform**

Standard orientation:

| Center<br>Number | Atomic<br>Number | Atomic<br>Type | Coordinates (Angstroms) |           |           |
|------------------|------------------|----------------|-------------------------|-----------|-----------|
|                  |                  |                | X                       | Y         | Z         |
| 1                | 35               | 0              | -4.120799               | -1.930667 | 0.333036  |
| 2                | 6                | 0              | -2.220786               | 2.271305  | -0.406283 |
| 3                | 6                | 0              | 3.470998                | -0.169759 | -0.045809 |
| 4                | 6                | 0              | 4.815228                | 0.048290  | 0.364267  |
| 5                | 6                | 0              | 2.425489                | 0.833350  | 0.229390  |
| 6                | 6                | 0              | 0.053237                | 1.410515  | 0.056429  |
| 7                | 1                | 0              | 0.374032                | 2.440558  | 0.163489  |
| 8                | 6                | 0              | -1.388013               | 1.193496  | -0.071564 |
| 9                | 6                | 0              | -3.346427               | -0.217143 | 0.022437  |
| 10               | 6                | 0              | -4.164199               | 0.851905  | -0.313892 |
| 11               | 1                | 0              | -5.234766               | 0.722227  | -0.406509 |
| 12               | 6                | 0              | -3.594703               | 2.095520  | -0.526139 |
| 13               | 1                | 0              | -4.225584               | 2.938047  | -0.789706 |
| 14               | 6                | 0              | 5.773904                | -0.945989 | 0.081955  |
| 15               | 1                | 0              | 6.796730                | -0.786354 | 0.407531  |
| 16               | 6                | 0              | 0.999124                | 0.466952  | 0.041578  |
| 17               | 1                | 0              | 0.741491                | -0.573886 | -0.096638 |
| 18               | 6                | 0              | -1.981258               | -0.052889 | 0.145952  |
| 19               | 1                | 0              | -1.365047               | -0.894358 | 0.434643  |
| 20               | 6                | 0              | 5.437141                | -2.091688 | -0.597897 |
| 21               | 1                | 0              | 6.202960                | -2.831601 | -0.804540 |
| 22               | 6                | 0              | 3.171456                | -1.353329 | -0.745279 |
| 23               | 1                | 0              | 2.162500                | -1.519697 | -1.097799 |
| 24               | 6                | 0              | 4.124486                | -2.304636 | -1.029386 |
| 25               | 1                | 0              | 3.860901                | -3.200232 | -1.578341 |
| 26               | 8                | 0              | 2.708398                | 1.964619  | 0.626035  |
| 27               | 8                | 0              | -1.633904               | 3.476953  | -0.616841 |
| 28               | 1                | 0              | -2.292085               | 4.153514  | -0.811764 |
| 29               | 7                | 0              | 5.201369                | 1.159517  | 1.045792  |
| 30               | 1                | 0              | 6.181101                | 1.319581  | 1.206888  |
| 31               | 1                | 0              | 4.566126                | 1.940952  | 1.087830  |

## 2) Tetrahydrofuran (THF)

Standard orientation:

| Center<br>Number | Atomic<br>Number | Atomic<br>Type | Coordinates (Angstroms) |           |           |
|------------------|------------------|----------------|-------------------------|-----------|-----------|
|                  |                  |                | X                       | Y         | Z         |
| 1                | 35               | 0              | -4.121325               | -1.931016 | 0.331160  |
| 2                | 6                | 0              | -2.221012               | 2.271943  | -0.403761 |
| 3                | 6                | 0              | 3.471338                | -0.169634 | -0.045470 |
| 4                | 6                | 0              | 4.815829                | 0.048897  | 0.363839  |
| 5                | 6                | 0              | 2.425885                | 0.833955  | 0.226750  |
| 6                | 6                | 0              | 0.053382                | 1.409323  | 0.052188  |
| 7                | 1                | 0              | 0.374011                | 2.440029  | 0.152790  |



|    |   |   |           |           |           |
|----|---|---|-----------|-----------|-----------|
| 8  | 6 | 0 | -1.387982 | 1.192871  | -0.073091 |
| 9  | 6 | 0 | -3.346504 | -0.216819 | 0.022926  |
| 10 | 6 | 0 | -4.164871 | 0.853602  | -0.308490 |
| 11 | 1 | 0 | -5.235802 | 0.725062  | -0.398304 |
| 12 | 6 | 0 | -3.595603 | 2.097387  | -0.519723 |
| 13 | 1 | 0 | -4.226741 | 2.940864  | -0.779135 |
| 14 | 6 | 0 | 5.774229  | -0.946277 | 0.083347  |
| 15 | 1 | 0 | 6.797158  | -0.786158 | 0.408138  |
| 16 | 6 | 0 | 0.999822  | 0.465957  | 0.042556  |
| 17 | 1 | 0 | 0.742850  | -0.575866 | -0.088730 |
| 18 | 6 | 0 | -1.981016 | -0.054102 | 0.143058  |
| 19 | 1 | 0 | -1.364360 | -0.896829 | 0.427040  |
| 20 | 6 | 0 | 5.436835  | -2.093358 | -0.594027 |
| 21 | 1 | 0 | 6.202413  | -2.833798 | -0.799504 |
| 22 | 6 | 0 | 3.170905  | -1.355031 | -0.742075 |
| 23 | 1 | 0 | 2.161730  | -1.522269 | -1.093472 |
| 24 | 6 | 0 | 4.123730  | -2.307019 | -1.024466 |
| 25 | 1 | 0 | 3.859722  | -3.203803 | -1.571249 |
| 26 | 8 | 0 | 2.709369  | 1.967570  | 0.618160  |
| 27 | 8 | 0 | -1.634163 | 3.477458  | -0.614037 |
| 28 | 1 | 0 | -2.292043 | 4.154175  | -0.810334 |
| 29 | 7 | 0 | 5.203021  | 1.160859  | 1.044416  |
| 30 | 1 | 0 | 6.183870  | 1.322583  | 1.198248  |
| 31 | 1 | 0 | 4.570993  | 1.945150  | 1.078637  |

### 3) Acetone

Standard orientation:

| Center<br>Number | Atomic<br>Number | Atomic<br>Type | Coordinates (Angstroms) |           |           |
|------------------|------------------|----------------|-------------------------|-----------|-----------|
|                  |                  |                | X                       | Y         | Z         |
| 1                | 35               | 0              | -4.122726               | -1.931364 | 0.327190  |
| 2                | 6                | 0              | -2.221230               | 2.273074  | -0.398503 |
| 3                | 6                | 0              | 3.472067                | -0.170053 | -0.044758 |
| 4                | 6                | 0              | 4.817103                | 0.050617  | 0.361983  |
| 5                | 6                | 0              | 2.426569                | 0.834581  | 0.221581  |
| 6                | 6                | 0              | 0.053727                | 1.406951  | 0.045207  |
| 7                | 1                | 0              | 0.374449                | 2.438592  | 0.134643  |
| 8                | 6                | 0              | -1.387924               | 1.191663  | -0.075199 |
| 9                | 6                | 0              | -3.347023               | -0.216204 | 0.023597  |
| 10               | 6                | 0              | -4.166034               | 0.856700  | -0.299301 |
| 11               | 1                | 0              | -5.237542               | 0.730080  | -0.384634 |
| 12               | 6                | 0              | -3.596858               | 2.100806  | -0.508224 |
| 13               | 1                | 0              | -4.228390               | 2.945978  | -0.760574 |
| 14               | 6                | 0              | 5.775258                | -0.946036 | 0.085717  |
| 15               | 1                | 0              | 6.798541                | -0.784114 | 0.408212  |
| 16               | 6                | 0              | 1.000849                | 0.463834  | 0.044138  |
| 17               | 1                | 0              | 0.744804                | -0.579562 | -0.075185 |
| 18               | 6                | 0              | -1.980960               | -0.056105 | 0.138160  |
| 19               | 1                | 0              | -1.363815               | -0.901134 | 0.414026  |

|    |   |   |           |           |           |
|----|---|---|-----------|-----------|-----------|
| 20 | 6 | 0 | 5.436981  | -2.096738 | -0.585316 |
| 21 | 1 | 0 | 6.202392  | -2.838046 | -0.788020 |
| 22 | 6 | 0 | 3.170371  | -1.359679 | -0.734366 |
| 23 | 1 | 0 | 2.160690  | -1.529273 | -1.083058 |
| 24 | 6 | 0 | 4.123078  | -2.312902 | -1.012835 |
| 25 | 1 | 0 | 3.858464  | -3.212695 | -1.554310 |
| 26 | 8 | 0 | 2.710825  | 1.972320  | 0.602827  |
| 27 | 8 | 0 | -1.633992 | 3.478466  | -0.607316 |
| 28 | 1 | 0 | -2.291081 | 4.155690  | -0.805444 |
| 29 | 7 | 0 | 5.205751  | 1.165557  | 1.038258  |
| 30 | 1 | 0 | 6.188179  | 1.330397  | 1.180182  |
| 31 | 1 | 0 | 4.577939  | 1.953564  | 1.059311  |

-----

#### 4) Ethanol

Standard orientation:

| Center<br>Number | Atomic<br>Number | Atomic<br>Type | Coordinates (Angstroms) |           |           |
|------------------|------------------|----------------|-------------------------|-----------|-----------|
|                  |                  |                | X                       | Y         | Z         |
| 1                | 35               | 0              | -4.123011               | -1.931307 | 0.326793  |
| 2                | 6                | 0              | -2.221166               | 2.273170  | -0.398042 |
| 3                | 6                | 0              | 3.472159                | -0.170161 | -0.044618 |
| 4                | 6                | 0              | 4.817287                | 0.050834  | 0.361705  |
| 5                | 6                | 0              | 2.426625                | 0.834504  | 0.221218  |
| 6                | 6                | 0              | 0.053770                | 1.406614  | 0.044638  |
| 7                | 1                | 0              | 0.374524                | 2.438324  | 0.133084  |
| 8                | 6                | 0              | -1.387909               | 1.191500  | -0.075372 |
| 9                | 6                | 0              | -3.347119               | -0.216101 | 0.023639  |
| 10               | 6                | 0              | -4.166124               | 0.857075  | -0.298513 |
| 11               | 1                | 0              | -5.237688               | 0.730685  | -0.383470 |
| 12               | 6                | 0              | -3.596901               | 2.101183  | -0.507227 |
| 13               | 1                | 0              | -4.228426               | 2.946529  | -0.758968 |
| 14               | 6                | 0              | 5.775465                | -0.945901 | 0.085774  |
| 15               | 1                | 0              | 6.798814                | -0.783701 | 0.407890  |
| 16               | 6                | 0              | 1.000942                | 0.463504  | 0.044354  |
| 17               | 1                | 0              | 0.744964                | -0.580016 | -0.073944 |
| 18               | 6                | 0              | -1.981001               | -0.056318 | 0.137729  |
| 19               | 1                | 0              | -1.363847               | -0.901579 | 0.412856  |
| 20               | 6                | 0              | 5.437105                | -2.097012 | -0.584541 |
| 21               | 1                | 0              | 6.202532                | -2.838351 | -0.787040 |
| 22               | 6                | 0              | 3.170344                | -1.360267 | -0.733439 |
| 23               | 1                | 0              | 2.160583                | -1.530211 | -1.081714 |
| 24               | 6                | 0              | 4.123078                | -2.313549 | -1.011586 |
| 25               | 1                | 0              | 3.858404                | -3.213690 | -1.552446 |
| 26               | 8                | 0              | 2.710923                | 1.972621  | 0.601594  |
| 27               | 8                | 0              | -1.633796               | 3.478503  | -0.606724 |
| 28               | 1                | 0              | -2.290741               | 4.155826  | -0.805085 |
| 29               | 7                | 0              | 5.206089                | 1.166111  | 1.037477  |
| 30               | 1                | 0              | 6.188673                | 1.331310  | 1.178123  |

|    |   |   |          |          |          |
|----|---|---|----------|----------|----------|
| 31 | 1 | 0 | 4.578632 | 1.954419 | 1.057336 |
|----|---|---|----------|----------|----------|

---

## 5) Methanol

Standard orientation:

| Center<br>Number | Atomic<br>Number | Atomic<br>Type | Coordinates (Angstroms) |           |           |
|------------------|------------------|----------------|-------------------------|-----------|-----------|
|                  |                  |                | X                       | Y         | Z         |
| 1                | 35               | 0              | -4.123371               | -1.931202 | 0.326423  |
| 2                | 6                | 0              | -2.221051               | 2.273264  | -0.397654 |
| 3                | 6                | 0              | 3.472257                | -0.170285 | -0.044489 |
| 4                | 6                | 0              | 4.817503                | 0.051089  | 0.361330  |
| 5                | 6                | 0              | 2.426676                | 0.834358  | 0.220947  |
| 6                | 6                | 0              | 0.053806                | 1.406243  | 0.044212  |
| 7                | 1                | 0              | 0.374597                | 2.437993  | 0.131946  |
| 8                | 6                | 0              | -1.387895               | 1.191329  | -0.075497 |
| 9                | 6                | 0              | -3.347228               | -0.215975 | 0.023678  |
| 10               | 6                | 0              | -4.166191               | 0.857480  | -0.297834 |
| 11               | 1                | 0              | -5.237808               | 0.731338  | -0.382476 |
| 12               | 6                | 0              | -3.596895               | 2.101571  | -0.506377 |
| 13               | 1                | 0              | -4.228391               | 2.947083  | -0.757599 |
| 14               | 6                | 0              | 5.775722                | -0.945713 | 0.085709  |
| 15               | 1                | 0              | 6.799148                | -0.783199 | 0.407392  |
| 16               | 6                | 0              | 1.001027                | 0.463130  | 0.044507  |
| 17               | 1                | 0              | 0.745094                | -0.580467 | -0.073085 |
| 18               | 6                | 0              | -1.981060               | -0.056530 | 0.137377  |
| 19               | 1                | 0              | -1.363905               | -0.902000 | 0.411852  |
| 20               | 6                | 0              | 5.437269                | -2.097245 | -0.583860 |
| 21               | 1                | 0              | 6.202722                | -2.838595 | -0.786186 |
| 22               | 6                | 0              | 3.170306                | -1.360894 | -0.732479 |
| 23               | 1                | 0              | 2.160449                | -1.531272 | -1.080240 |
| 24               | 6                | 0              | 4.123092                | -2.314201 | -1.010344 |
| 25               | 1                | 0              | 3.858336                | -3.214711 | -1.550546 |
| 26               | 8                | 0              | 2.711024                | 1.972795  | 0.600665  |
| 27               | 8                | 0              | -1.633491               | 3.478491  | -0.606253 |
| 28               | 1                | 0              | -2.290269               | 4.155940  | -0.804864 |
| 29               | 7                | 0              | 5.206459                | 1.166649  | 1.036661  |
| 30               | 1                | 0              | 6.189187                | 1.332182  | 1.176149  |
| 31               | 1                | 0              | 4.579305                | 1.955206  | 1.055581  |

---

## 6) Dimethyl sulfoxide (DMSO)

Standard orientation:

| Center | Atomic | Atomic | Coordinates (Angstroms) |  |  |
|--------|--------|--------|-------------------------|--|--|
|--------|--------|--------|-------------------------|--|--|

| Number | Number | Type | X         | Y         | Z         |
|--------|--------|------|-----------|-----------|-----------|
| 1      | 35     | 0    | -4.123729 | -1.931123 | 0.325942  |
| 2      | 6      | 0    | -2.220966 | 2.273376  | -0.397099 |
| 3      | 6      | 0    | 3.472371  | -0.170429 | -0.044317 |
| 4      | 6      | 0    | 4.817729  | 0.051361  | 0.360977  |
| 5      | 6      | 0    | 2.426740  | 0.834247  | 0.220517  |
| 6      | 6      | 0    | 0.053859  | 1.405830  | 0.043553  |
| 7      | 1      | 0    | 0.374699  | 2.437654  | 0.130126  |
| 8      | 6      | 0    | -1.387877 | 1.191130  | -0.075689 |
| 9      | 6      | 0    | -3.347353 | -0.215850 | 0.023723  |
| 10     | 6      | 0    | -4.166297 | 0.857930  | -0.296918 |
| 11     | 1      | 0    | -5.237978 | 0.732062  | -0.381128 |
| 12     | 6      | 0    | -3.596933 | 2.102022  | -0.505206 |
| 13     | 1      | 0    | -4.228419 | 2.947739  | -0.755721 |
| 14     | 6      | 0    | 5.775985  | -0.945529 | 0.085762  |
| 15     | 1      | 0    | 6.799494  | -0.782660 | 0.406967  |
| 16     | 6      | 0    | 1.001132  | 0.462721  | 0.044761  |
| 17     | 1      | 0    | 0.745272  | -0.581017 | -0.071631 |
| 18     | 6      | 0    | -1.981120 | -0.056782 | 0.136874  |
| 19     | 1      | 0    | -1.363962 | -0.902527 | 0.410482  |
| 20     | 6      | 0    | 5.437441  | -2.097567 | -0.582917 |
| 21     | 1      | 0    | 6.202922  | -2.838948 | -0.784995 |
| 22     | 6      | 0    | 3.170288  | -1.361627 | -0.731337 |
| 23     | 1      | 0    | 2.160335  | -1.532439 | -1.078584 |
| 24     | 6      | 0    | 4.123116  | -2.314997 | -1.008809 |
| 25     | 1      | 0    | 3.858294  | -3.215936 | -1.548256 |
| 26     | 8      | 0    | 2.711130  | 1.973128  | 0.599199  |
| 27     | 8      | 0    | -1.633233 | 3.478530  | -0.605524 |
| 28     | 1      | 0    | -2.289828 | 4.156107  | -0.804405 |
| 29     | 7      | 0    | 5.206856  | 1.167349  | 1.035664  |
| 30     | 1      | 0    | 6.189756  | 1.333304  | 1.173683  |
| 31     | 1      | 0    | 4.580087  | 1.956231  | 1.053198  |
